# Supplementary material
Source: publisher figshare collection journal article supplement (https://acs.figshare.com/ndownloader/files/3960895)
Supplement: Supplementary file 1 [file 3960895]

# **One-Step Carbonization Synthesis of Hollow Carbon Nanococoons with Multimodal Pores and their Enhanced Electrochemical Performance for Supercapacitor**

Jianan Zhang,<sup>a</sup> Kaixi Wang,<sup>a</sup> Shaojun Guo,<sup>\*b</sup> Shoupei Wang,<sup>a</sup> Zhiqiang Liang,<sup>c</sup> Zhimin Chen,<sup>a</sup> Jianwei Fu,<sup>a</sup> and Qun Xu<sup>\*a</sup>

<sup>a</sup>College of Materials Science and Engineering, Zhengzhou University, Zhengzhou 450052, P. R. China. Fax: (+86)371-67767827; Tel: (+86)371-6776782; E-mail: [qunxu@zzu.edu.cn](mailto:qunxu@zzu.edu.cn)

<sup>b</sup>Physical Chemistry and Applied Spectroscopy, Los Alamos National Laboratory, Los Alamos, New Mexico 87545, United States; E-mail: [shaojun.guo.nano@gmail.com](mailto:shaojun.guo.nano@gmail.com)

<sup>c</sup>Key Laboratory of Inorganic Synthesis and Preparative Chemistry, College of Chemistry, Jilin University, Changchun 130012, P. R. China.

## **Figures**

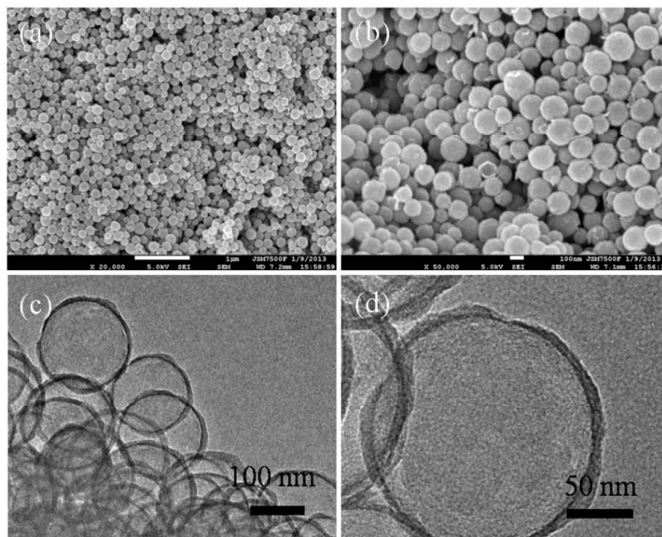

**Fig. S1** SEM (a, b) and TEM (c, d) images of HCNs at different magnifications.

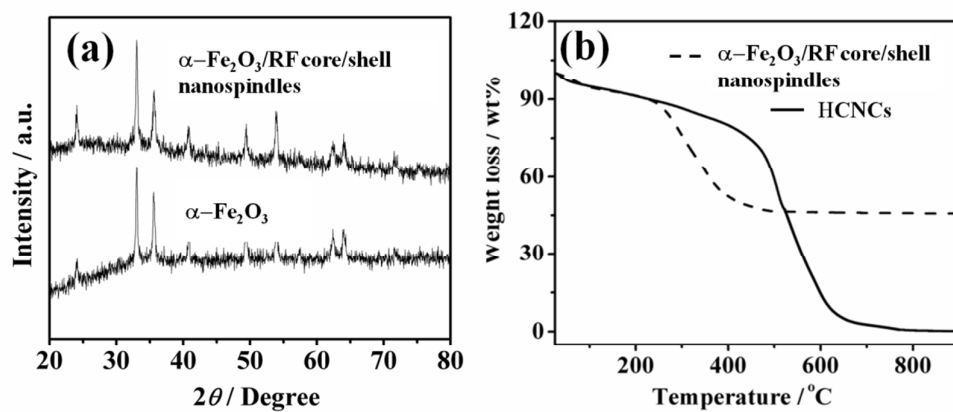

**Fig. S2** (a) XRD patterns of spindle  $\alpha\text{-Fe}_2\text{O}_3$  and  $\alpha\text{-Fe}_2\text{O}_3/\text{RF}$  core/shell nanospindles, respectively. (b) TGA curves of HCNCs and  $\alpha\text{-Fe}_2\text{O}_3/\text{RF}$  core/shell nanospindles under air atmosphere with a heating rate of  $10\text{ }^\circ\text{C min}^{-1}$ , respectively.

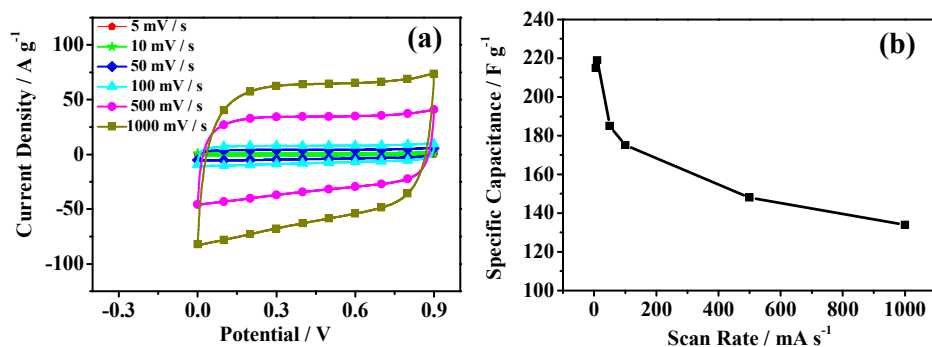

**Fig. S3** Cyclic voltammograms (a) and specific capacitances (vs. scan rate) (b) of HCNCs. The test electrodes were prepared by loading a slurry consisting of 80 wt % active materials, 10 wt % carbon black, and 10 wt % poly(tetrafluoroethylene) (used as a binder, PTFE 60 wt% dispersion in  $\text{H}_2\text{O}$ , Sigma-Aldrich) on a nickel foam ( $1 \times 1\text{ cm}^2$ ,  $1.5 \times 1.5\text{ cm}^2$ ) and dried at  $60\text{ }^\circ\text{C}$  for 24 h. As-made electrodes were pressed at a pressure of 10 MPa for 1 min and further dried in a vacuum oven at  $60\text{ }^\circ\text{C}$  overnight. The loading mass of the active materials is 2 mg. The electrolyte was 2.0 M KOH aqueous solution.

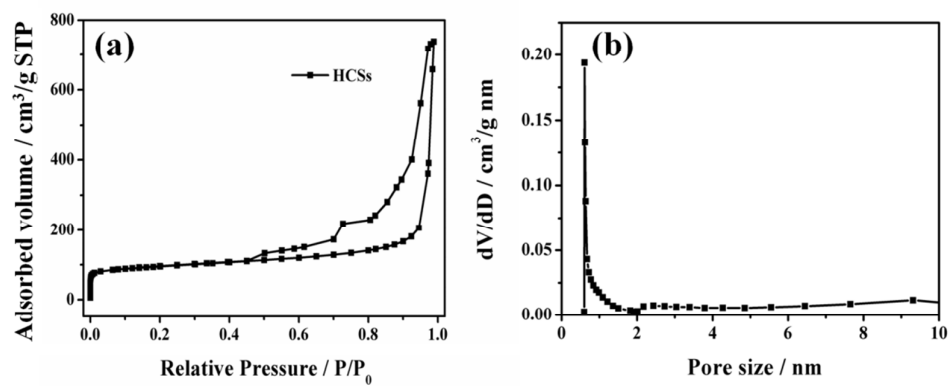

**Fig. S4** (a)  $N_2$  sorption isotherms and (b) the BJH pore size distribution curves of HCSs.

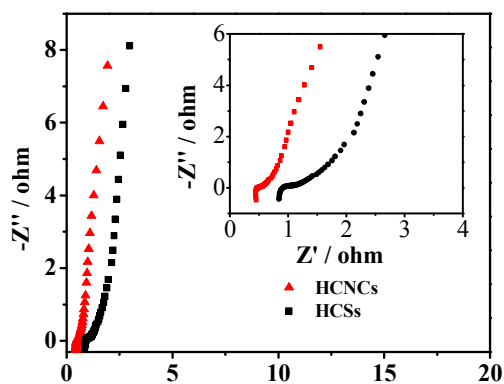

**Fig. S5** Electrochemical impedance spectra of HCNCs and HCSs measured in the frequency range of 10 mHz to 10 kHz at the open circuit voltage with an alternate current amplitude of 5 mV.
